# Supplementary material for: Overexpression of PheNAC3 from moso bamboo promotes leaf senescence and enhances abiotic stress tolerance in Arabidopsis
Source: PeerJ journal article supplement (doi:10.7717/peerj.8716), 2020-03-31
Supplement: Raw_data_1.zip [file Raw_data_1.zip]

## Sheet: MS
1/2 MS			WT	OE-3-10	OE-3-14	OE-3-15
			Germination rate
	2 d	Repeat 1	0.836735	0.933333	0.866667	0.807692
		Repeat 1	0.714286	0.886364	0.690476	0.829787
		Repeat 1	0.85	0.770833	0.822222	0.840909
		Average	0.80034	0.86351	0.793122	0.82613
		Error	0.0748199	0.0836258	0.0916292	0.0169078
	3 d	Repeat 1	1	1	1	1
		Repeat 1	1	1	1	1
		Repeat 1	1	1	1	1
		Average	1	1	1	1
		Error	0	0	0	0

## Sheet: NaCl
1/2 MS+NaCl			WT	OE-3-10	OE-3-14	OE-3-15
			Germination rate
	2 d	Repeat 1	0	0.391304	0.302326	0.137255
		Repeat 2	0	0.577778	0.545455	0.234043
		Repeat 3	0	0.391304	0.408163	0.232558
		Average	0	0.453462	0.418648	0.201285
		Error	0	0.10766	0.121903	0.0554568
	3 d	Repeat 1	0.292683	0.913043	0.906977	0.745098
		Repeat 2	0.275	0.933333	0.969697	0.617021
		Repeat 3	0.447368	0.934783	0.938776	0.767442
		Average	0.33835	0.927053	0.938483	0.709854
		Error	0.0948254	0.0121543	0.0313611	0.0811678
	4 d	Repeat 1	0.560976	0.956522	0.930233	0.921569
		Repeat 2	0.6	1	1	0.787234
		Repeat 3	0.631579	0.913043	0.979592	0.930233
		Average	0.597518	0.956522	0.969941	0.879678
		Error	0.035367	0.0434783	0.0358709	0.0801763

## Sheet: Mannitol
1/2 MS+Mannitol			WT	OE-3-10	OE-3-14	OE-3-15
			Germination rate
	2 d	Repeat 1	0.282051	0.897959	0.813953	0.673913
		Repeat 1	0.232558	0.942308	0.857143	0.756098
		Repeat 1	0.190476	0.869565	0.930233	0.641026
		Average	0.235029	0.903277	0.86711	0.690345
		Error	0.0458375	0.0366617	0.0587768	0.0592698
	3 d	Repeat 1	0.641026	1	0.953488	0.978261
		Repeat 1	0.767442	0.980769	1	1
		Repeat 1	0.857143	0.956522	1	1
		Average	0.755203	0.979097	0.984496	0.992754
		Error	0.108577	0.0217873	0.0268535	0.0125511
	4 d	Repeat 1	0.820513	1	1	0.978261
		Repeat 1	0.930233	1	1	1
		Repeat 1	0.928571	1	1	1
		Average	0.893106	1	1	0.992754
		Error	0.0628727	0	0	0.0125511
